# Supplementary material for: Phosphorylation of Serine 114 on Atg32 mediates mitophagy
Source: PubMed Central journal article supplement — Mol Biol Cell. 2011 Sep 1;22(17):3206–17. doi: 10.1091/mbc.E11-02-0145 (PMC3164466; doi:10.1091/mbc.e11-02-0145), 2011-09-01
Supplement: supp_E11-02-0145_E11-02-0145RRSuppl.pdf [file supp_E11-02-0145_E11-02-0145RRSuppl.pdf]

**Table S1: Yeast strains used in this study**

| Strain  | Genotype                                                                                                     | Source                          |
|---------|--------------------------------------------------------------------------------------------------------------|---------------------------------|
| PJ69-4A | MATa <i>trp1-Δ901 leu2-3,112 901 ura3-52 his3-Δ200 gal4Δ gal8Δ GAL2-ADE2 LYS2::GAL1-HIS3 met2::GAL7-lacZ</i> | (James <i>et al.</i> , 1996)    |
| SEY6210 | MATα <i>his3-Δ200 leu2-3,112 lys2-801 trp1-Δ901 ura3-52 suc2-Δ9 GAL</i>                                      | (Robinson <i>et al.</i> , 1988) |
| TKYM22  | SEY6210 <i>OM45-GFP::TRP1</i>                                                                                | (Kanki and Klionsky, 2008)      |
| TKYM25  | SEY6210 <i>atg1Δ::KanMX6 OM45-GFP::TRP1</i>                                                                  | (Kanki <i>et al.</i> , 2009)    |
| TKYM140 | SEY6210 <i>atg32Δ::LEU2 OM45-GFP::TRP1</i>                                                                   | This study                      |
| TKYM165 | SEY6210 <i>atg32Δ::HIS5 S.p.</i>                                                                             | This study                      |
| TKYM218 | SEY6210 <i>atg11Δ::LEU2 atg32Δ::HIS5 S.p.</i>                                                                | This study                      |
| TKYM236 | SEY6210 <i>pho8Δ::HIS5 S.p. pho13Δ::LEU2</i>                                                                 | This study                      |
| TKYM242 | SEY6210 <i>hog1Δ::HIS5 S.p.</i>                                                                              | This study                      |
| TKYM243 | SEY6210 <i>pbs2Δ::HIS5 S.p.</i>                                                                              | This study                      |
| TKYM248 | SEY6210 <i>pho8Δ::HIS5 S.p. pho13Δ::LEU2 hog1Δ::URA3</i>                                                     | This study                      |
| TKYM249 | SEY6210 <i>pho8Δ::HIS5 S.p. pho13Δ::LEU2 pbs2Δ::URA3</i>                                                     | This study                      |
| TKYM250 | SEY6210 <i>hog1Δ::HIS5 S.p. OM45-GFP::TRP1</i>                                                               | This study                      |
| TKYM251 | SEY6210 <i>pbs2Δ::HIS5 S.p. OM45-GFP::TRP1</i>                                                               | This study                      |
| TKYM254 | SEY6210 <i>hog1Δ::HIS5 S.p. PEX14-GFP:: KanMX6</i>                                                           | This study                      |
| TKYM255 | SEY6210 <i>pbs2Δ::HIS5 S.p. PEX14-GFP:: KanMX6</i>                                                           | This study                      |
| TKYM256 | SEY6210 <i>pho8Δ::HIS5 S.p. pho13Δ::LEU2 atg1Δ::URA3</i>                                                     | This study                      |

|         |                                                          |                                 |
|---------|----------------------------------------------------------|---------------------------------|
| TKYM280 | BY4742 <i>OM45-GFP::His3MX6</i>                          | This study                      |
| TKYM281 | BY4742 <i>ssk2Δ::KanMX6</i><br><i>OM45-GFP::HIS3MX6</i>  | This study                      |
| TKYM282 | BY4742 <i>ssk22Δ::KanMX6</i><br><i>OM45-GFP::HIS3MX6</i> | This study                      |
| TKYM283 | BY4742 <i>ste11Δ::KanMX6</i><br><i>OM45-GFP::HIS3MX6</i> | This study                      |
| TKYM284 | BY4742 <i>ssk1Δ::KanMX6</i><br><i>OM45-GFP::HIS3MX6</i>  | This study                      |
| TKYM285 | BY4742 <i>msb2Δ::KanMX6</i><br><i>OM45-GFP::HIS3MX6</i>  | This study                      |
| TKYM286 | BY4742 <i>sho1Δ::KanMX6</i><br><i>OM45-GFP::HIS3MX6</i>  | This study                      |
| TKYM287 | BY4742 <i>atg1Δ::KanMX6</i><br><i>OM45-GFP::HIS3MX6</i>  | This study                      |
| TKYM288 | SEY6210 <i>atg1Δ::KanMX6</i><br><i>atg32Δ::LEU</i>       | This study                      |
| TKYM290 | SEY6210 <i>hog1Δ::HIS5 S.p.</i><br><i>atg1Δ::LEU2</i>    | This study                      |
| TKYM291 | SEY6210 <i>pbs2Δ::HIS5 S.p.</i><br><i>atg1Δ::LEU2</i>    | This study                      |
| TKYM292 | BY4742 <i>hog1Δ::KanMX6</i><br><i>OM45-GFP::HIS3MX6</i>  | This study                      |
| TKYM293 | BY4742 <i>pbs2Δ::KanMX6</i><br><i>OM45-GFP::HIS3MX6</i>  | This study                      |
| WHY1    | SEY6210 <i>atg1Δ::HIS5 S.p.</i>                          | (Shintani <i>et al.</i> , 2002) |
| YTS147  | SEY6210 <i>atg11Δ::LEU2</i>                              | (Kanki and Klionsky, 2008)      |

## References

James, P., Halladay, J., and Craig, E.A. (1996). Genomic libraries and a host strain designed for highly efficient two-hybrid selection in yeast. *Genetics* 144, 1425-1436.

Robinson, J.S., Klionsky, D.J., Banta, L.M., and Emr, S.D. (1988). Protein sorting in *Saccharomyces cerevisiae*: isolation of mutants defective in the delivery and processing of multiple vacuolar hydrolases. *Mol Cell Biol* 8, 4936-4948.

Kanki, T., and Klionsky, D.J. (2008). Mitophagy in yeast occurs through a selective mechanism. *J Biol*

Chem 283, 32386-32393.

Kanki, T., Wang, K., Baba, M., Bartholomew, C.R., Lynch-Day, M.A., Du, Z., Geng, J., Mao, K., Yang, Z., Yen, W.L., and Klionsky, D.J. (2009). A genomic screen for yeast mutants defective in selective mitochondria autophagy. *Mol Biol Cell* 20, 4730-4738.

Shintani, T., Huang, W.P., Stromhaug, P.E., and Klionsky, D.J. (2002). Mechanism of cargo selection in the cytoplasm to vacuole targeting pathway. *Dev Cell* 3, 825-837.

A

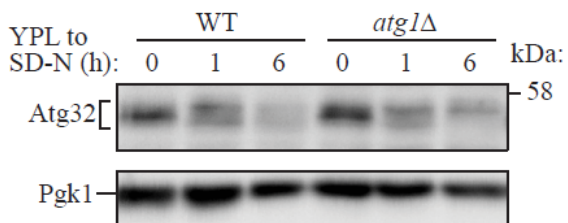

B

```

1  MVLEYQQREGKGSSSSKSMPPDSSSTTIHTCSEAQTGEDKGLLDPHLSVLELLSKTGHSPS 60
                                     114 119
61  PMGQNLVTSIDISGNHNVNDSISGSWQAIQPLDLGASFIPERCSSQTTNGSILSSSDTSE 120
121  EEQELLQAPAADIINIKQGQEGANVVSPSHPFKQLQKIISLPLPGKEKTPFNEQDDGD 180
181  EDEAFEEDSVTITKSLTSST.....ILALGYILL* 529
                                     stop

```

C

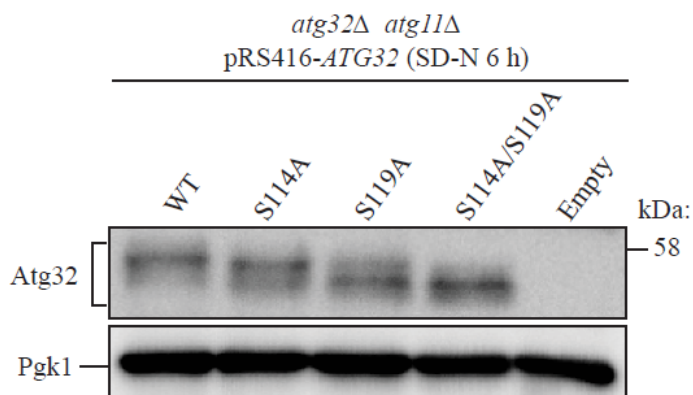

### Figure S1

(A) Wild-type (WT) or *atg1Δ* strains were cultured in YPL medium until the mid-log growth phase and then shifted to SD-N medium for 0, 1 and 6 hours. The amount and the modification of endogenous Atg32 were observed by immunoblotting with anti-Atg32 and anti-Pgk1 (loading control) antibodies. (B) Amino acid sequence of Atg32. Ser or Thr residues, which we screened as candidate phosphorylation sites on Atg32, are denoted in red. (C) To clarify the change in molecular weight of Atg32 mutants, samples from the same experiment shown in Figure 2C (SD-N 6 h) were evaluated by immunoblotting with anti-Atg32 and anti-Pgk1 (loading control) antibodies.

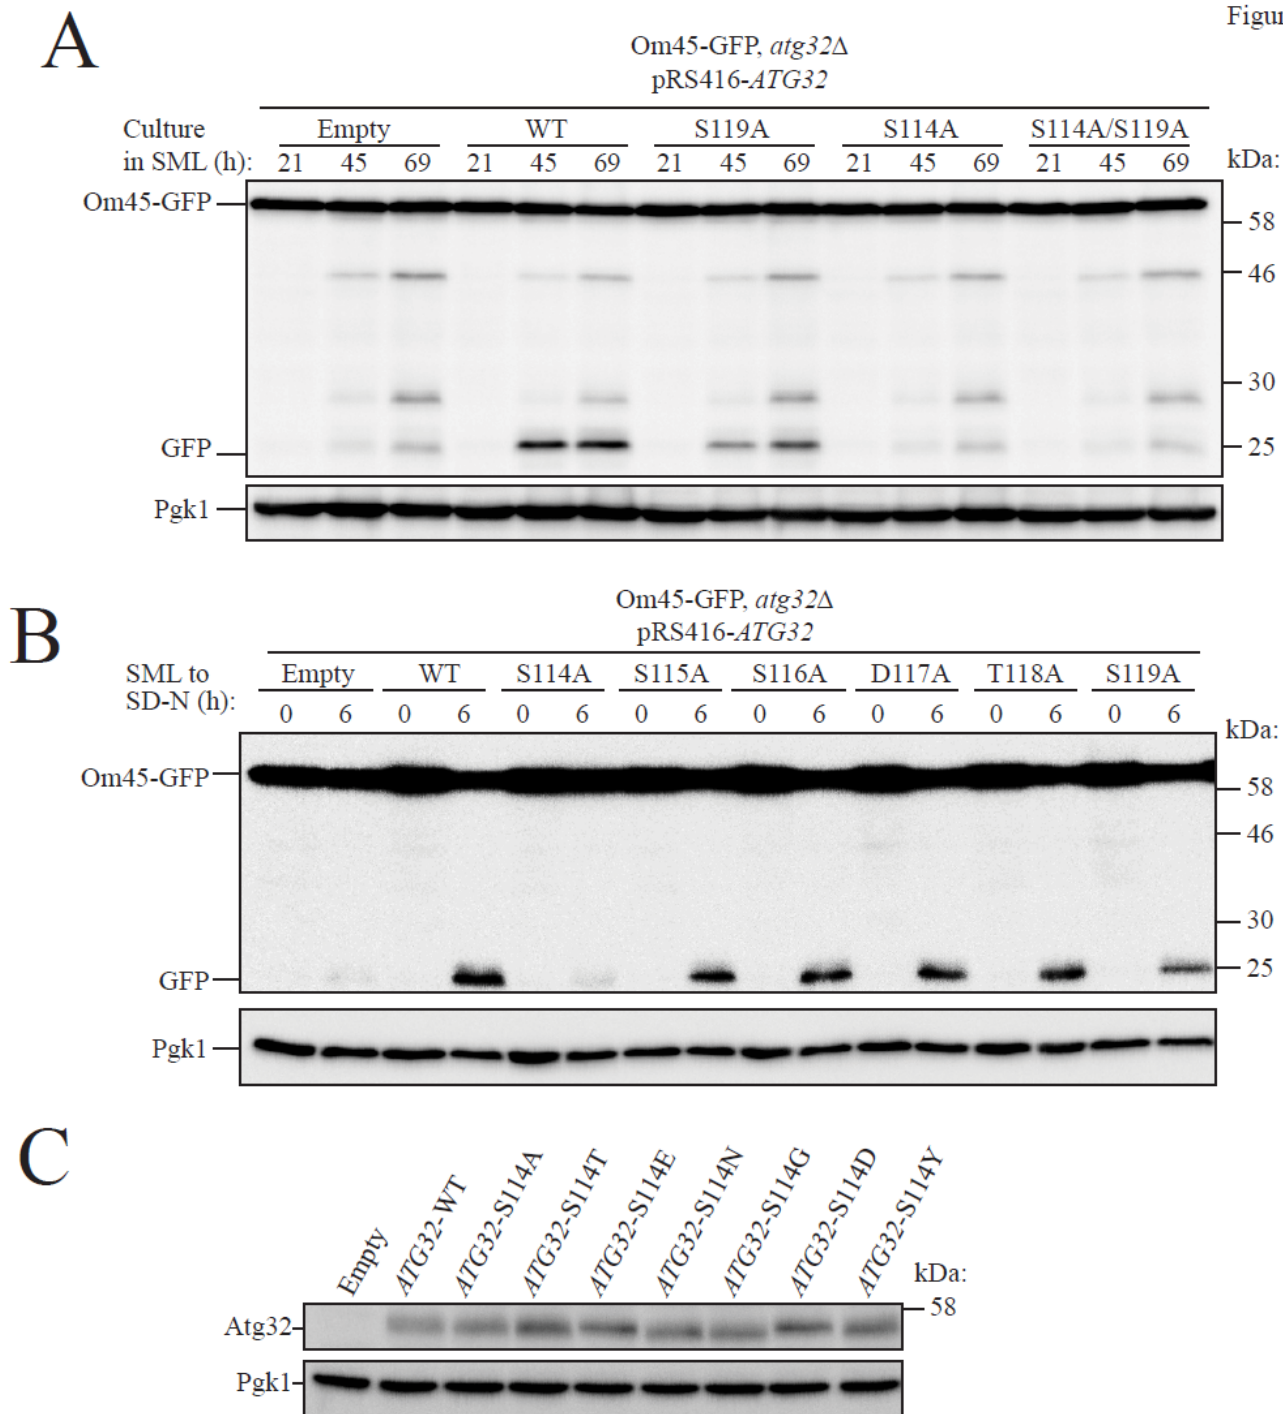**Figure S2**

(A) Strains of *atg32Δ* expressing Om45-GFP were transformed with the indicated Atg32 mutants expressing vectors. Cells were cultured in SML medium for a maximum of 69 hours to allow cellular growth to the post-logarithmic phase, and cells were collected at the indicated periods. GFP processing was monitored by immunoblotting with anti-GFP and anti-Pgk1 (loading control) antibodies. (B)

Strains of *atg32Δ* expressing Om45-GFP were transformed with the indicated Atg32 mutant-expressing vectors. Cells were cultured in SML medium until the mid-log growth phase and then shifted to SD-N for 6 hours. GFP processing was monitored by immunoblotting with anti-GFP and anti-Pgk1 (loading control) antibodies. (C) The *atg32Δ* strain was transformed with the indicated Atg32 mutant-expressing vectors. Cells were cultured in SML medium until the mid-log growth phase and the expression level of Atg32 mutants was observed by immunoblotting with anti-Atg32 and anti-Pgk1 (loading control) antibodies.

Figure S3

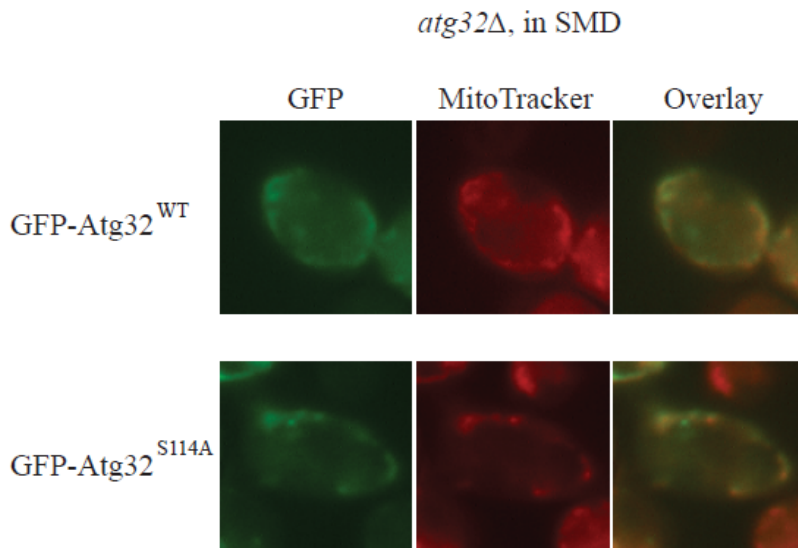

**Figure S3**

The *atg32Δ* strain transformed with a plasmid expressing GFP-tagged Atg32<sup>WT</sup> or Atg32<sup>S114A</sup> under the control of the *CUP1* promoter was cultured in SMD medium until the mid-log growth phase. Cells were labeled with the mitochondrial marker MitoTracker Red and analyzed by fluorescence microscopy.



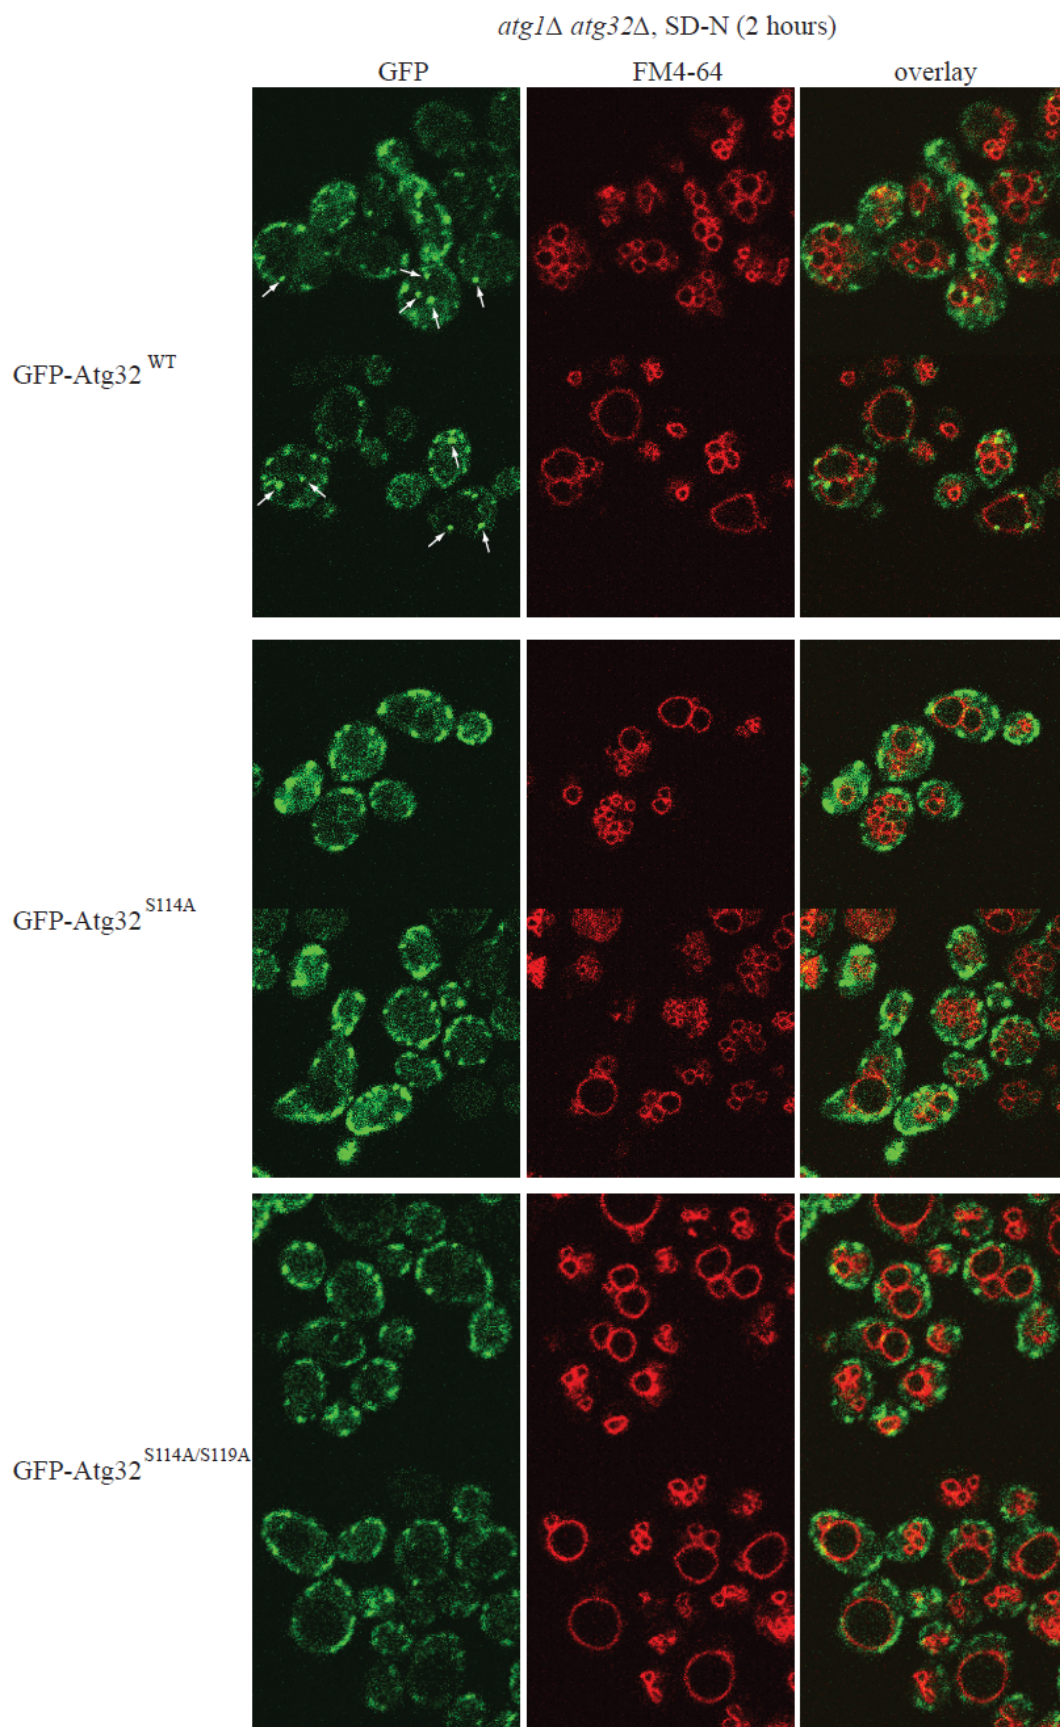

## Figure S4

*Atg1Δ* and *atg32Δ* double knockout strains transformed with a plasmid expressing GFP-tagged Atg32<sup>WT</sup>, Atg32<sup>S114A</sup>, or Atg32<sup>S114A/S119A</sup> under the control of the *CUPI* promoter were cultured in SMD medium until the mid-log growth phase, and then shifted to starvation medium (SD-N) for 2 hours. Cells were labeled with the vacuolar marker FM4-64 and analyzed by confocal laser microscopy.



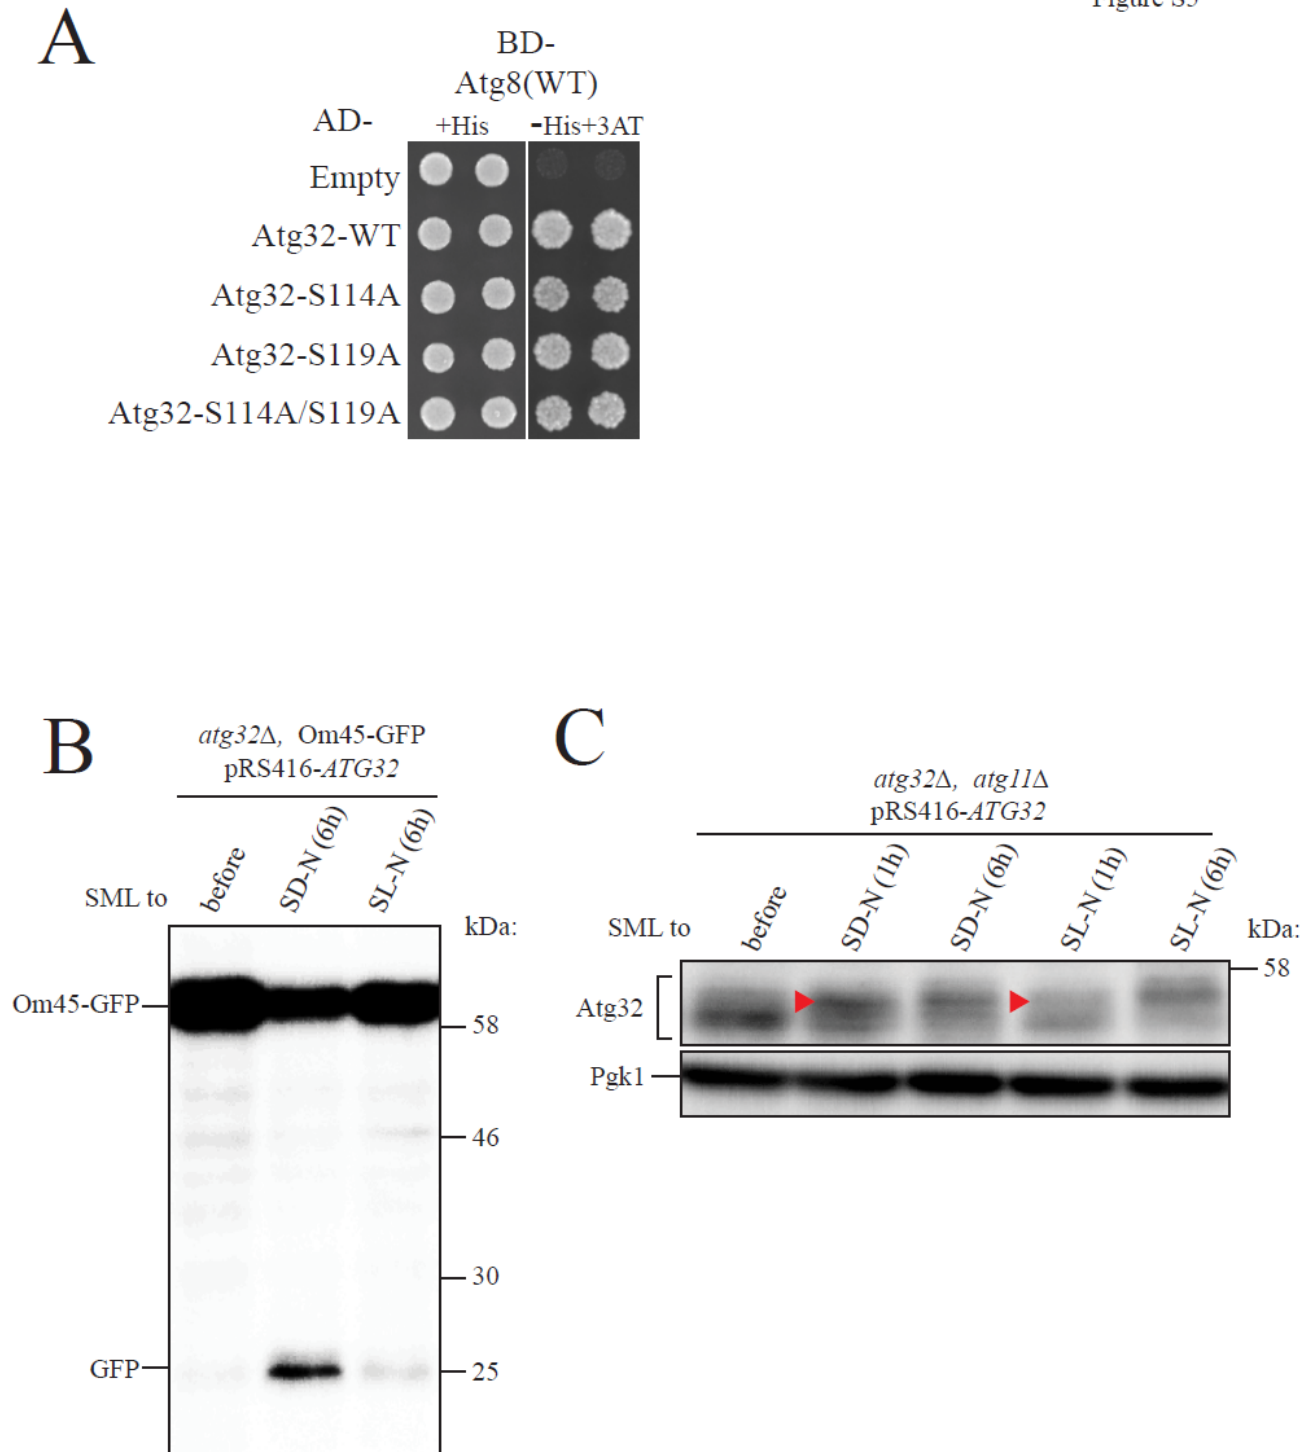**Figure S5**

A) Yeast two-hybrid analysis between Atg8 and Atg32 mutants. The PJ69–4A strain was transformed with pGAD and pGBD plasmids, which can express the indicated proteins. Cells were grown on +His plate or –His plate supplemented with 6 mM 3-aminotriazole (3AT) and grown at 30°C for 4 days. (B) Strains of *atg32Δ* expressing Om45-GFP were transformed with wild-type Atg32-expressing vectors.

Cells were cultured in SML medium until the mid-log growth phase and then shifted to SD-N or SL-N for 6 hours. GFP processing was monitored by immunoblotting with anti-GFP antibodies. (C) The *atg32Δ* and *atg11Δ* double knockout strains transformed with wild-type Atg32-expressing vector were cultured in SML medium until the mid-log growth phase, and then shifted to SD-N or SL-N for 1 and 6 hours. The modification of Atg32 mutants was monitored by immunoblotting with anti-Atg32 and anti-Pgk1 (loading control) antibodies.

A

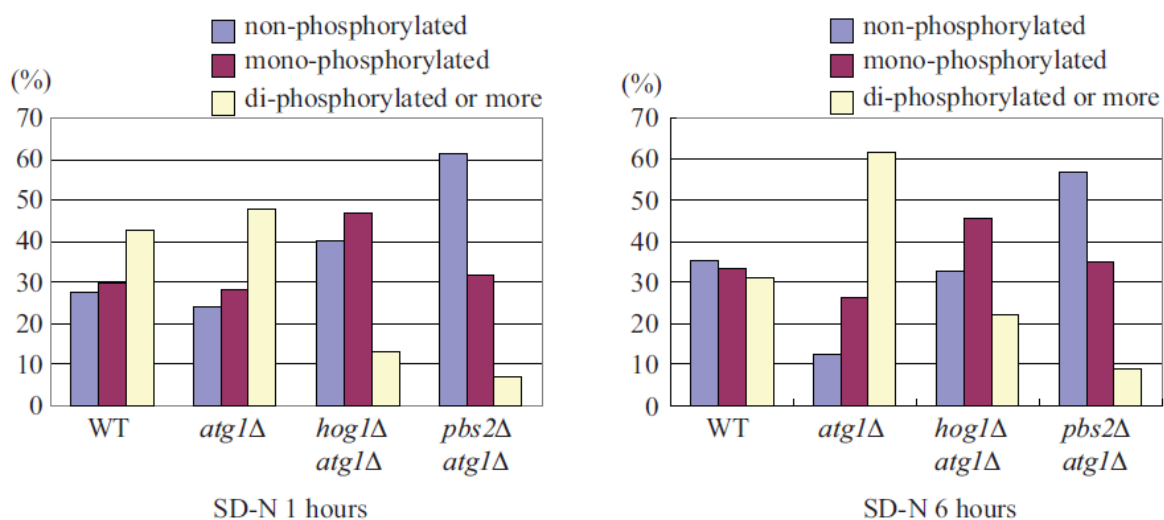

B

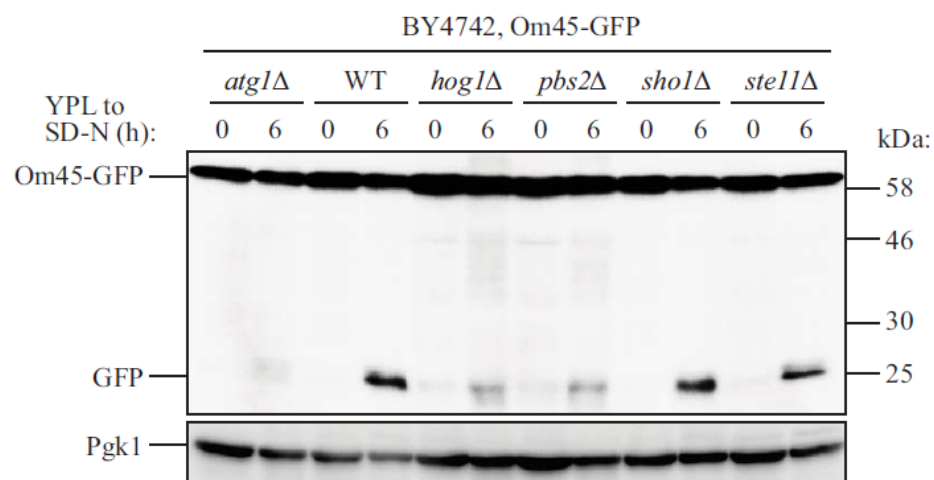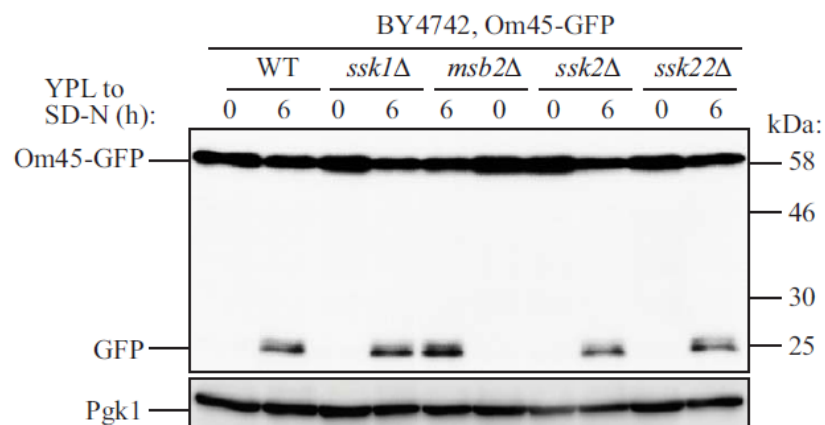

## Figure S6

(A) The signal intensity of each phosphorylated and non-phosphorylated bands of an immunoblot image shown in Figure 4A were quantified using Image Gauge software (Fujifilm). (B) Strains deleted for the indicated genes and expressing Om45-GFP were cultured in YPL medium until the mid-log growth phase and then shifted to SD-N for 6 hours. GFP processing was monitored by immunoblotting with anti-GFP and anti-Pgk1 (loading control) antibodies.

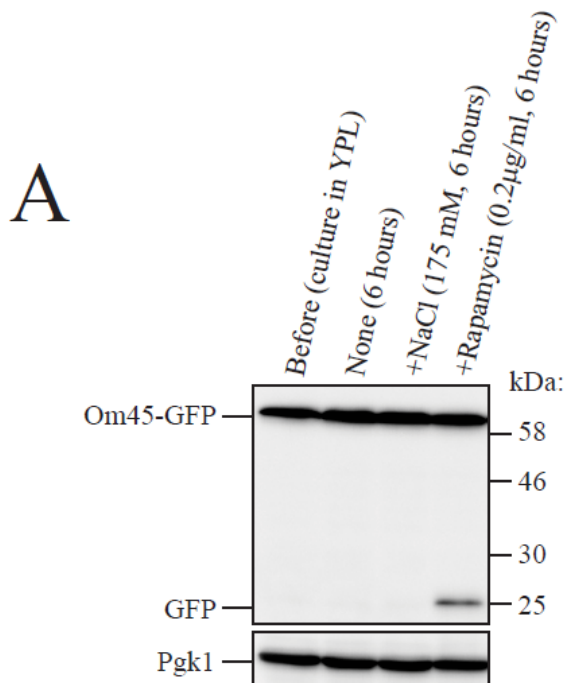

## B

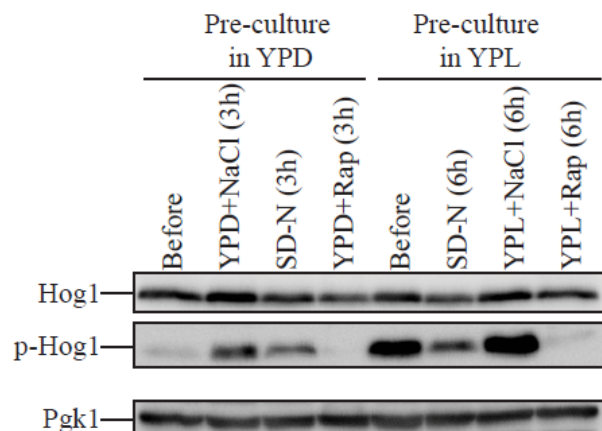

Figure S7

## Figure S7

(A) Wild-type cells expressing Om45-GFP were cultured in YPL medium until the mid-log growth phase and then NaCl (for osmotic stress) or rapamycin (as a positive control for mitophagy) was added. After 6 hours, GFP processing was monitored by immunoblotting with anti-GFP and anti-Pgk1 (loading control) antibodies. (B) Wild-type cells were cultured in YPD or YPL until the mid-log growth phase and NaCl (175mM) or 0.2 μg/ml rapamycin was added or shifted to SD-N for the indicated periods. Total Hog1 expression, phosphorylated Hog1, and Pgk1 (loading control) were observed by immunoblotting.

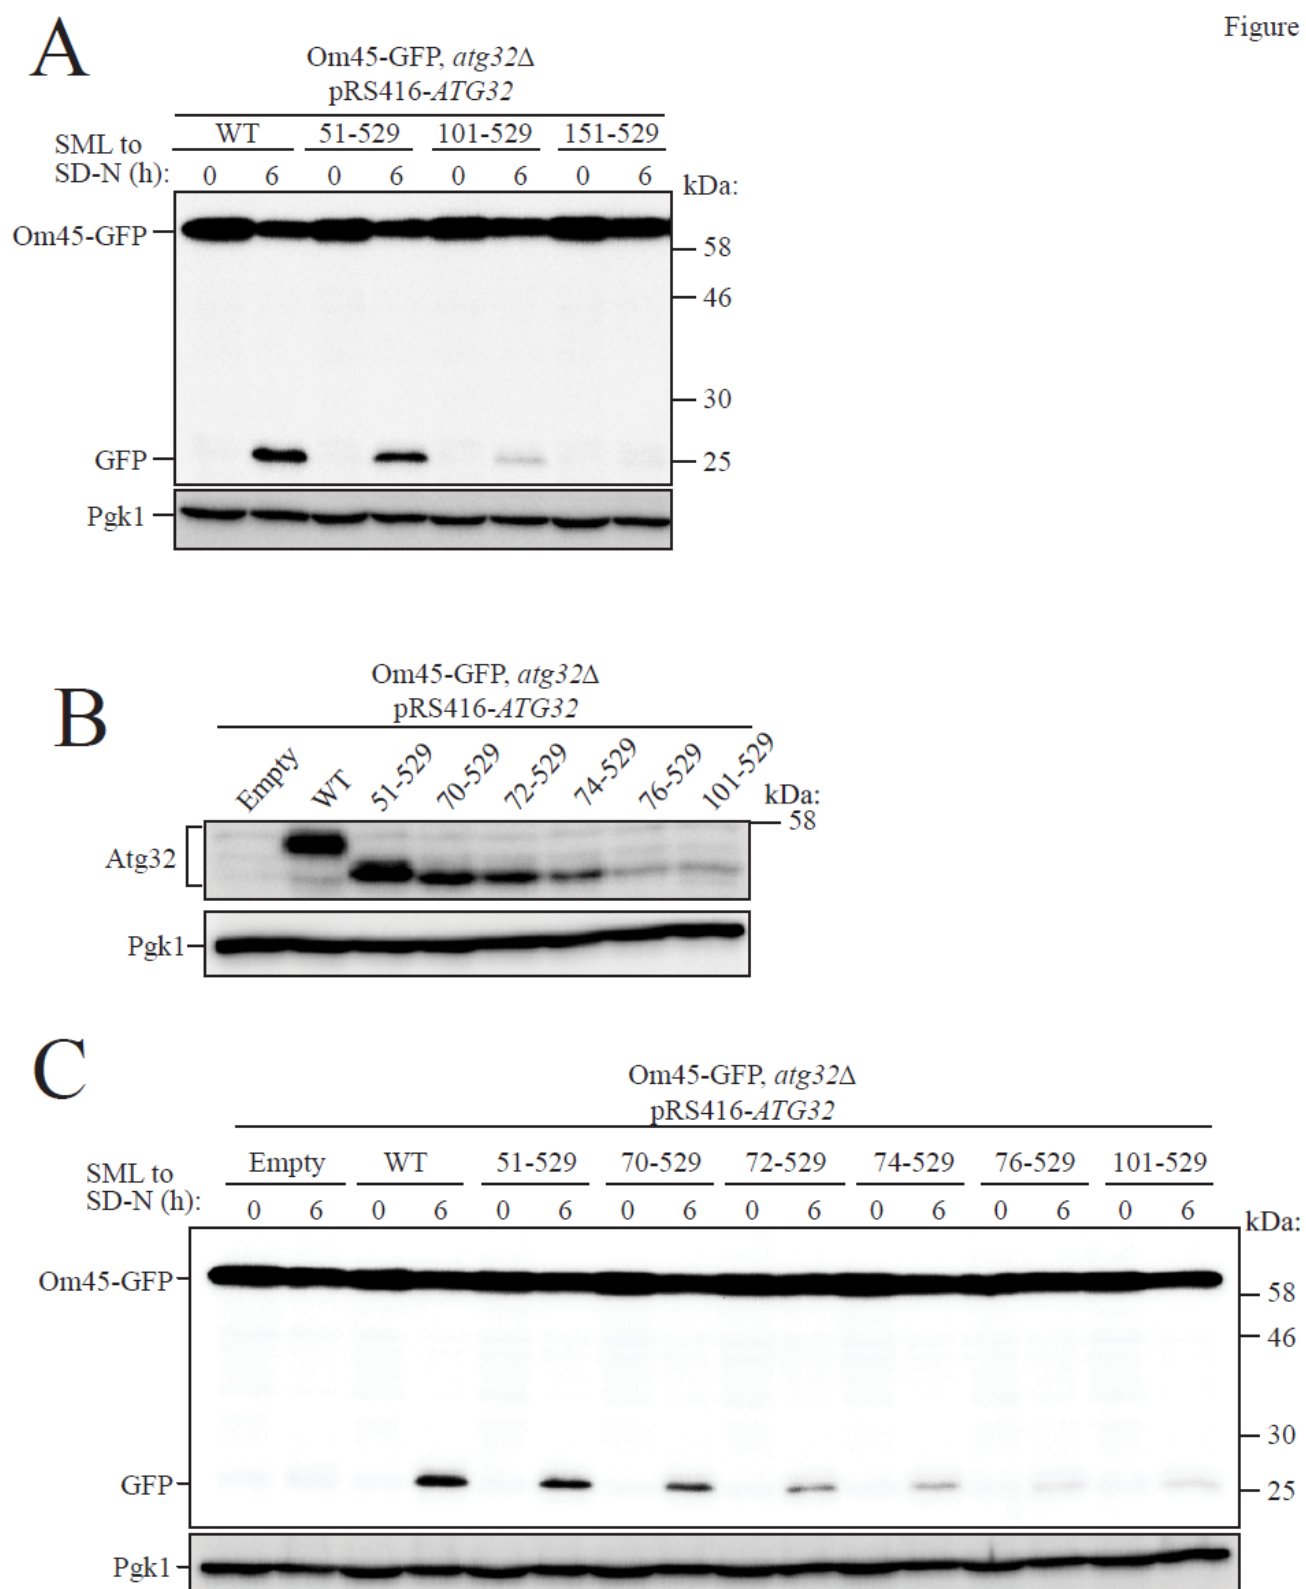**Figure S8**

(A, C) Strains of *atg32Δ* expressing Om45-GFP were transformed with the indicated Atg32

mutant-expressing vectors. Cells were cultured in SML medium until the mid-log growth phase and then shifted to SD-N for 6 hours. GFP processing was monitored by immunoblotting with anti-GFP and anti-Pgk1 (loading control) antibodies. (B) The same cells shown in panel C were cultured in SML medium until the mid-log growth phase and the expression level of Atg32 mutants was observed by immunoblotting with anti-Atg32 and anti-Pgk1 (loading control) antibodies.

A

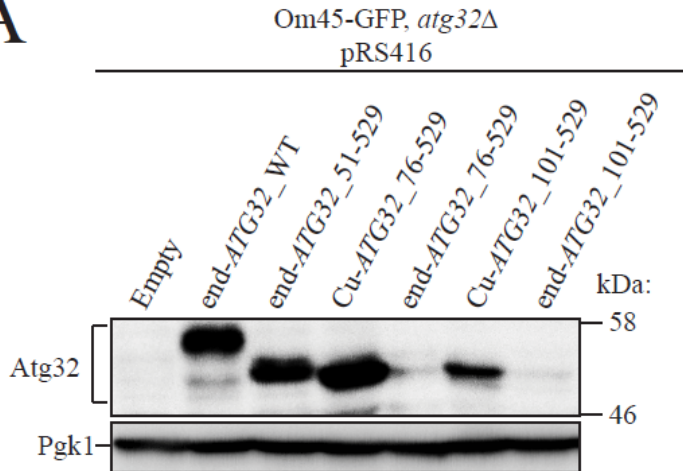

B

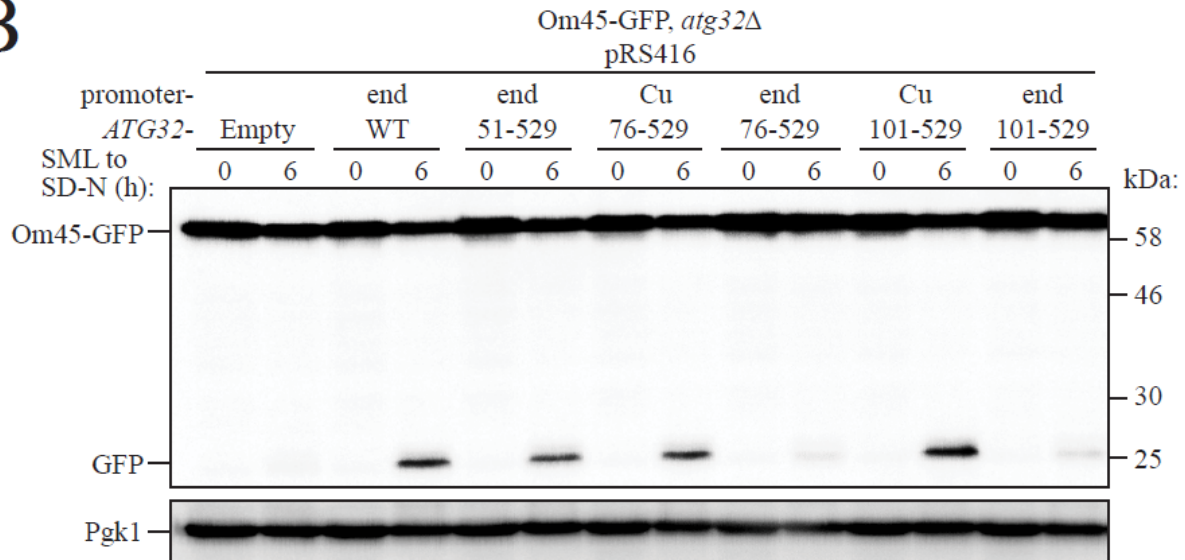

C

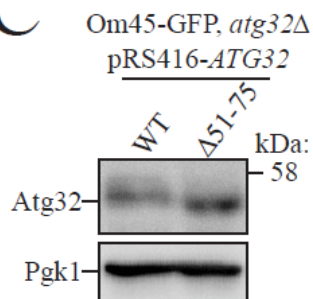

D

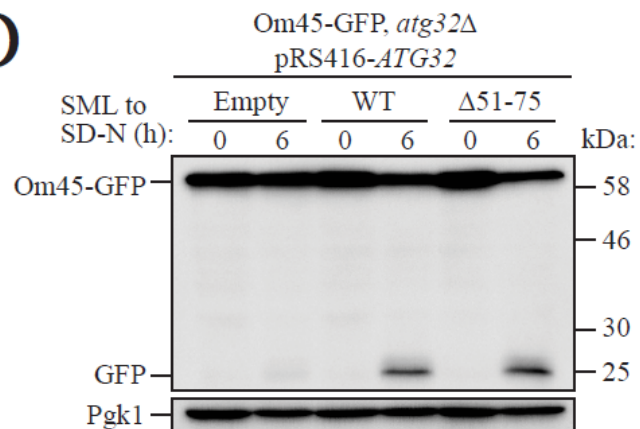



## Figure S9

(A, C) Strains of *atg32Δ* expressing Om45-GFP were transformed with plasmids expressing Atg32 mutants under the endogenous *ATG32* promoter (pRS416-end-*ATG32*\_WT, pRS416-end-*ATG32*\_51-529, pRS416-end-*ATG32*\_76-529, pRS416-end-*ATG32*\_101-529, or pRS416-end-*ATG32*\_Δ51-75) or under the *CUP1* promoter (pRS416-Cu-*ATG32*\_76-529 or pRS416-Cu-*ATG32*\_101-529). Cells were cultured in SML medium until the mid-log growth phase and the expression level of Atg32 mutants was observed by immunoblotting with anti-Atg32 and anti-Pgk1 (loading control) antibodies. (B, D) The same cells shown in panels A and C were cultured in SML until the mid-log growth phase and then shifted to SD-N for 6 hours. GFP processing was monitored by immunoblotting with anti-GFP and anti-Pgk1 (loading control) antibodies.
